# Supplementary material for: Role of carboxylic acid groups in the reduction of nitric oxide by carbon at low temperature, as exemplified by graphene oxide
Source: Royal Society of Chemistry journal article supplement (doi:10.1039/c7cp01541k), 2017-01-01
Supplement: c7cp01541k1.pdf [file c7cp01541k1.pdf]

## **Supporting Information**

### **Role of carboxylic acid group in reduction of nitric oxide by carbon at low temperature, as exemplified by graphene oxide**

J. Zhang, Q. Gao, X.M. Li, J.Z. Zhou, X.X. Ruan, Q. Liu, G.R. Qian and Z.P. Xu

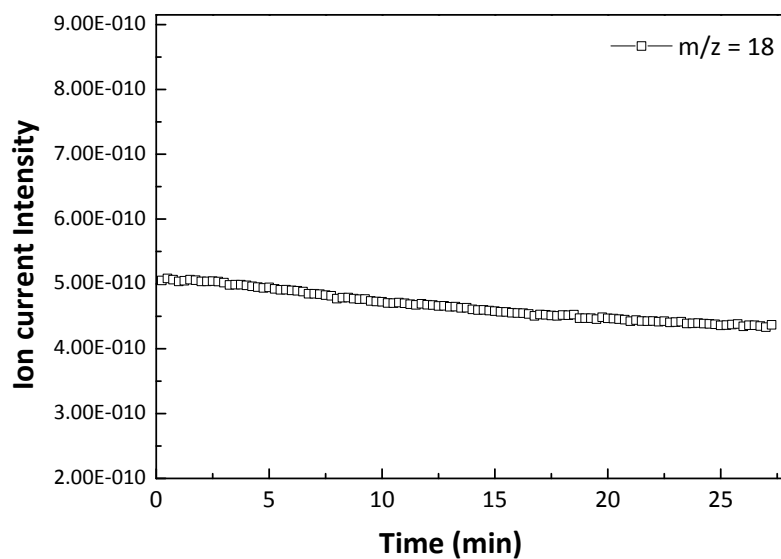

Fig. S1. Evolved H<sub>2</sub>O (m/z=18) during NO reduction at 100°C by GO<sub>100</sub>.

Note that the ion current of m/z=18 decreased continuously, which indicated that there was no water evolved during the reduction of NO.

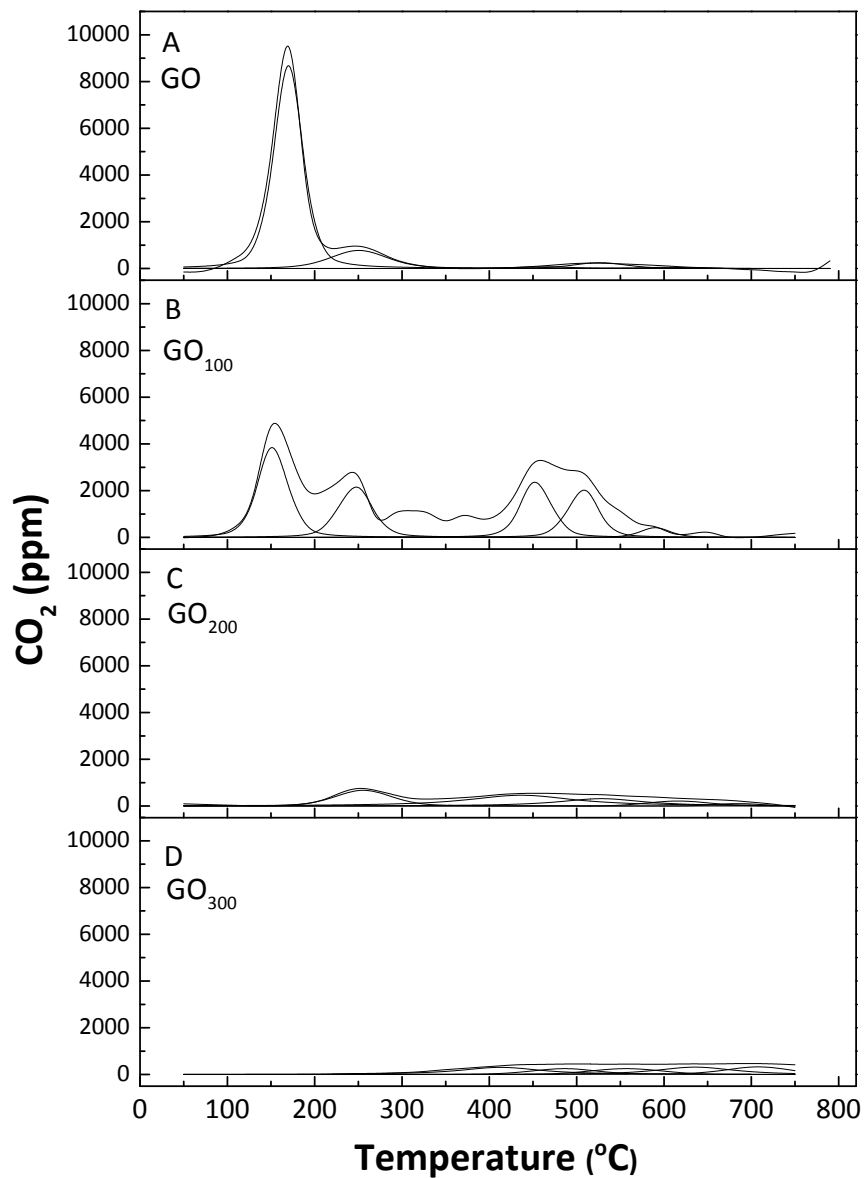

Fig. S2. Evolved CO<sub>2</sub> of catalyst collected after pyrolysis under N<sub>2</sub> at 100 (A), 200 (B) and 300°C (C). The GO stands for the original sample

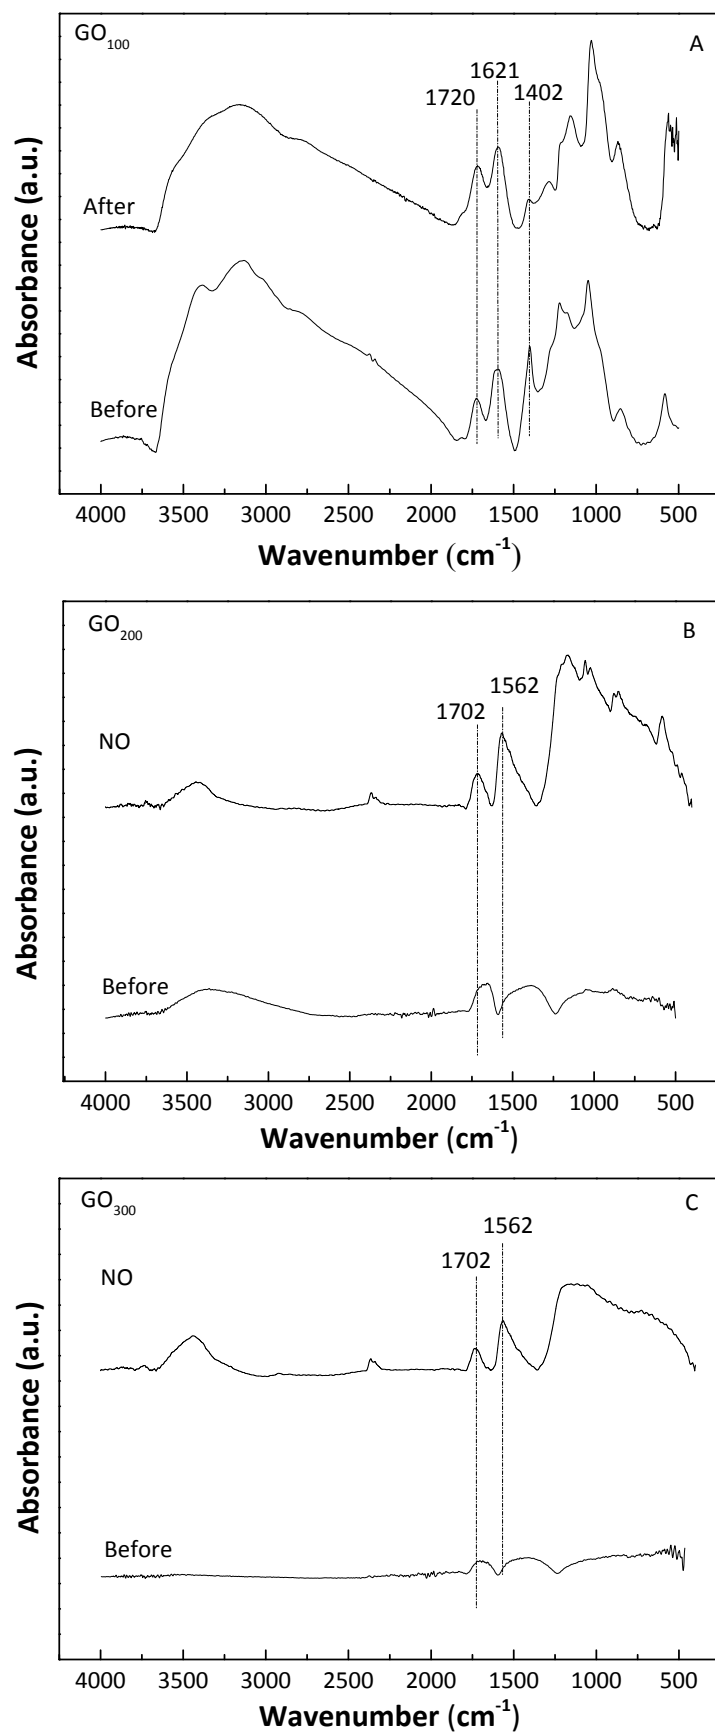

Fig. S3. FTIRs of GO-derived materials before and after reaction with NO.

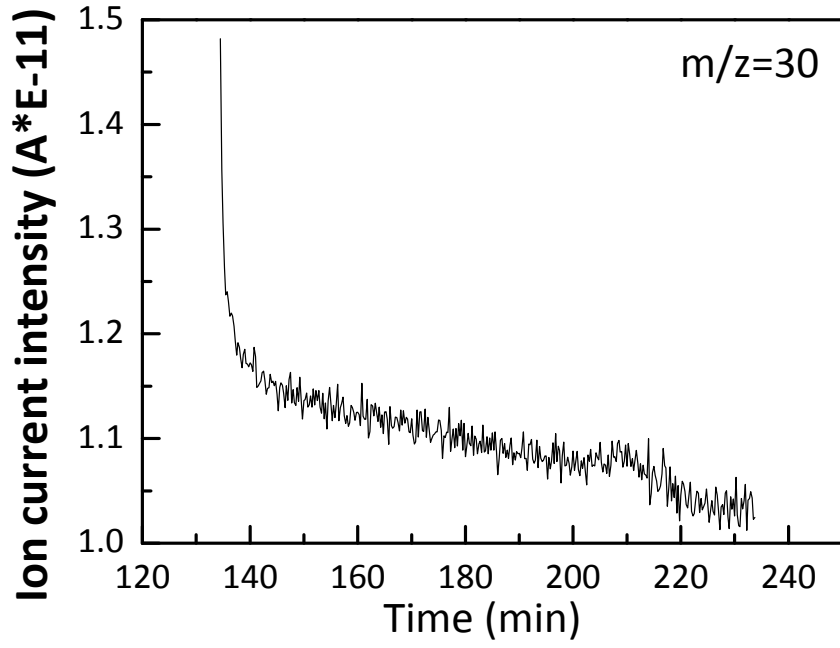

Fig. S4. Evolution of NO from 140 to 240 min.

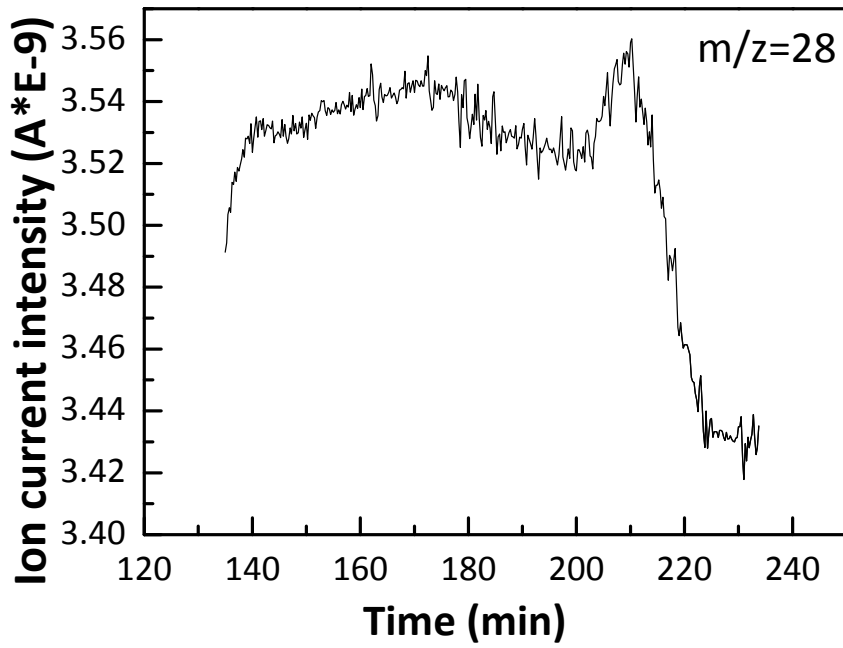

Fig. S5. Evolution of CO/N<sub>2</sub> from 140 to 240 min.
